# Supplementary material
Source: PubMed Central journal article supplement (PMC5971603)
Supplement: AAC.00160-18_zac006187209s1.pdf [file AAC.00160-18_zac006187209s1.pdf]

## Supplementary file

Table S1. ST273 *K. pneumoniae* strains with genome sequences available in the GenBank.

| Strain <sup>a</sup> | Accession no. | Recovery date | Location        |
|---------------------|---------------|---------------|-----------------|
| ARPG-340            | NBOK000000000 | 2013          | Philippines     |
| ARPG-372            | NBOL000000000 | 2013          | Philippines     |
| ARPG-379            | NBOM000000000 | 2013          | Philippines     |
| ARPG-380            | NBON000000000 | 2013          | Philippines     |
| ARPG-381            | NBOO000000000 | 2013          | Philippines     |
| K45-67              | LLWB000000000 | 2007          | Norway          |
| Kpn223              | CP015025      | 2013          | USA             |
| COL-Kpn50           | NCNC000000000 | 2007          | Colombia        |
| COL-Kpn113          | NCPN000000000 | 2004          | Colombia        |
| 337                 | MOSH000000000 | 2012          | China (Beijing) |

<sup>a</sup>All strains were recovered from human except strain Kpn223, which was recovered from human associated environment (the exact type of environment is not specified)

Table S2. SNPs between genomes of ST273 strains.

|             | WCHKP020034 | ARPG-340 | ARPG-372 | ARPG-379 | ARPG-380 | ARPG-381 | COL-Kpn50 | COL-Kpn113 | K45-67 | Kpn223 | 337 |
|-------------|-------------|----------|----------|----------|----------|----------|-----------|------------|--------|--------|-----|
| WCHKP020034 | 0           | 233      | 265      | 289      | 291      | 254      | 141       | 116        | 123    | 144    | 154 |
| ARPG-340    | 233         | 0        | 175      | 204      | 203      | 167      | 177       | 151        | 172    | 187    | 199 |
| ARPG-372    | 265         | 175      | 0        | 234      | 234      | 202      | 210       | 184        | 205    | 220    | 232 |
| ARPG-379    | 289         | 204      | 234      | 0        | 261      | 228      | 235       | 209        | 230    | 245    | 257 |
| ARPG-380    | 291         | 203      | 234      | 261      | 0        | 218      | 235       | 209        | 230    | 245    | 257 |
| ARPG-381    | 254         | 167      | 202      | 228      | 218      | 0        | 199       | 173        | 194    | 209    | 221 |
| COL-Kpn50   | 141         | 177      | 210      | 235      | 235      | 199      | 0         | 48         | 79     | 94     | 106 |
| COL-Kpn113  | 116         | 151      | 184      | 209      | 209      | 173      | 48        | 0          | 53     | 68     | 80  |
| K45-67      | 123         | 172      | 205      | 230      | 230      | 194      | 79        | 53         | 0      | 81     | 93  |
| Kpn223      | 144         | 187      | 220      | 245      | 245      | 209      | 94        | 68         | 81     | 0      | 108 |
| 337         | 154         | 199      | 232      | 257      | 257      | 221      | 106       | 80         | 93     | 108    | 0   |
